# Supplementary material
Source: PubMed Central journal article supplement (PMC7855435)
Supplement: NIHMS1654000-supplement-1654000_Supp_Fig1.pdf [file NIHMS1654000-supplement-1654000_Supp_Fig1.pdf]

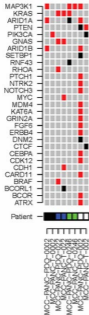

**Supplementary Figure 1. Characterization of IPMN tumor organoids by DNA sequencing.**

OncoPrint demonstrates genes with protein-altering (red boxes) and protein-truncating (black boxes) mutations in a subset of paired IPMN parental tumor (T) and PDO samples from pathologically-confirmed low-grade (T002, T0002, T0246) and moderate-grade (T022) IPMN cases.
